# Supplementary material for: Impact of positive charge and ring-size on the interactions of calixarenes with DNA, RNA and nucleotides
Source: Royal Society of Chemistry journal article supplement (doi:10.1039/d2nj00061j), 2022-01-01
Supplement: d2nj00061j1.pdf [file d2nj00061j1.pdf]

## Electronic Supplementary Information

### Impact of positive charge and ring-size on interactions of calixarenes with DNA, RNA and nucleotides

Ivona Krošl<sup>a</sup>, Ena Otković<sup>a</sup>, Ivana Nikšić-Franjić<sup>a</sup>, Benoit Colasson<sup>b</sup>, Olivia Reinaud<sup>b</sup>, Aleksandar Višnjevac<sup>a</sup>, and Ivo Piantanida<sup>a\*</sup>

\*

<sup>a</sup> Ruđer Bošković Institute, Bijenička Cesta 54, 10000 Zagreb, Croatia;

<sup>b</sup> Université de Paris - Laboratoire de Chimie et Biochimie, CNRS UMR 8601, 45 rue des Saints Pères, 75006 Paris, France.

\*Correspondence: [pianta@irb.hr](mailto:pianta@irb.hr) (I.P.); Tel.: +385-1-4571-326

#### CONTENTS:

1. Table S1: Structural features of selected nucleic acids.
2. Spectrophotometric characterization
3. Fluorimetric titrations with nucleotides
4. Titrations with DNA/RNA – displacement experiments
5. Thermal denaturation experiments
6. Circular dichroism (CD) experiments

**1. Table S1:** Structural features of selected nucleic acids.<sup>1,2</sup>

| Structure type                       | Groove width [Å] |            | Groove depth [Å] |       |
|--------------------------------------|------------------|------------|------------------|-------|
|                                      | major            | minor      | major            | minor |
| <b>poly A- poly U (A-helix)</b>      | <b>3.8</b>       | 10.9       | 13.5             | 2.8   |
| <b>ct-DNA (B-helix)</b>              | 11.7             | <b>5.7</b> | 8.5              | 7.5   |
| <b>(dGdC)<sub>n</sub> (B-helix)</b>  | 13.5             | 9.5        | 10.0             | 7.2   |
| <b>p(dAdT)<sub>2</sub> (B-helix)</b> | 11.2             | <b>6.3</b> | -                | -     |
| <b>pdA – pdT (C-helix)</b>           | 11.4             | <b>3.3</b> | -                | -     |

<sup>1</sup> Saenger, W. *Principles of Nucleic Acid Structure*; Springer-Verlag, New York, 1983.

<sup>2</sup> Cantor, C. R.; Schimmel, P. R. *Biophysical Chemistry* 1980, **3**, 1109-1181.

## 2. Spectrophotometric characterization:

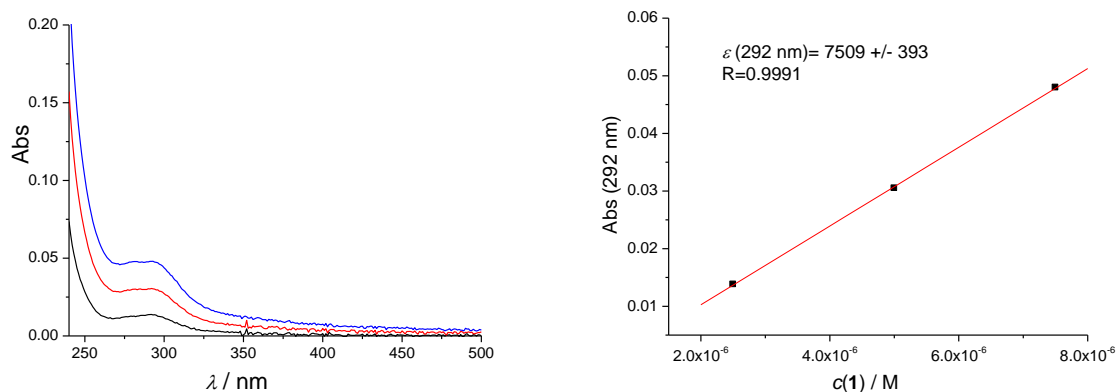

Figure S1. Concentration dependence of **1** UV/Vis spectrum in sodium cacodylate buffer pH 7,  $l = 0.05$  M.

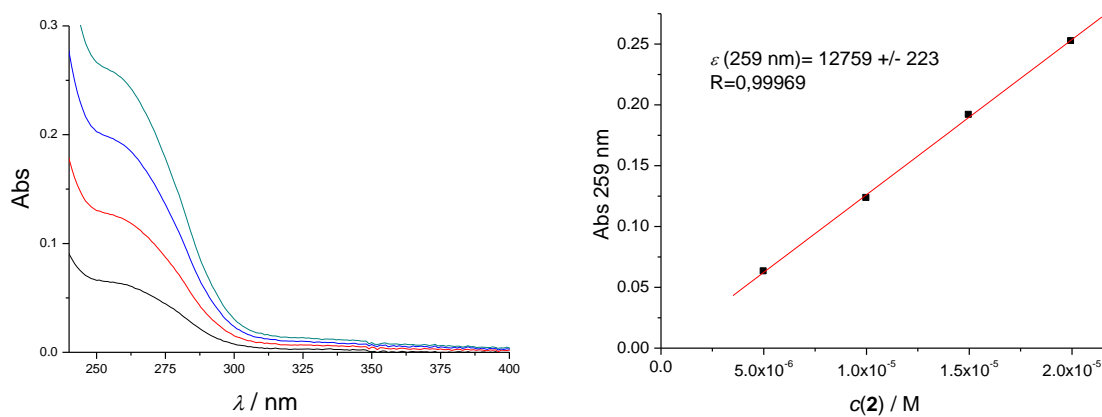

Figure S2. Concentration dependence of **2** UV/Vis spectrum in buffered solution pH 7,  $l = 0.05$  M.

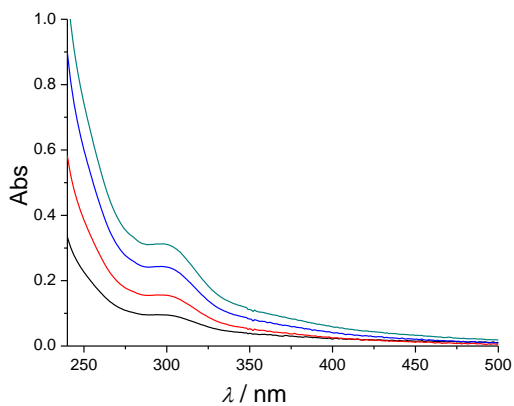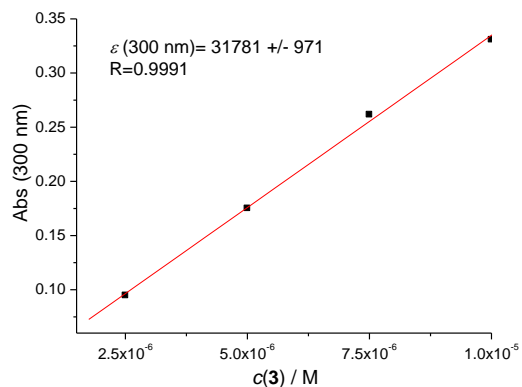

Figure S3. Concentration dependence of **3** UV/Vis spectrum in sodium cacodylate buffer pH 7,  $I = 0.05 \text{ M}$ .

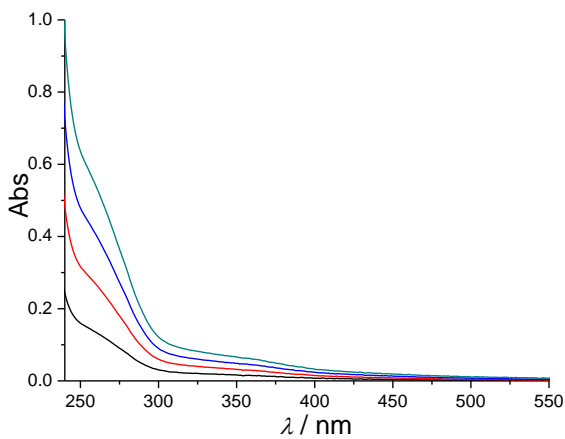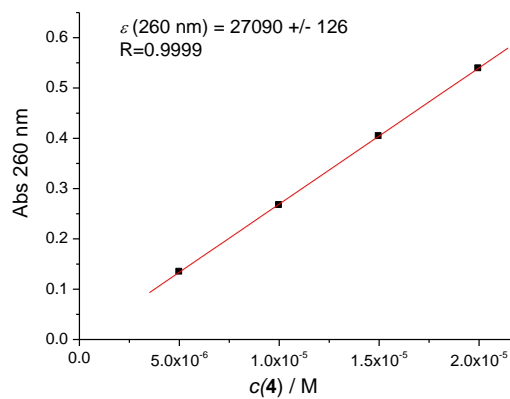

Figure S4. Concentration dependence of **4** UV/Vis spectrum in sodium cacodylate buffer pH 7,  $I = 0.05 \text{ M}$ .

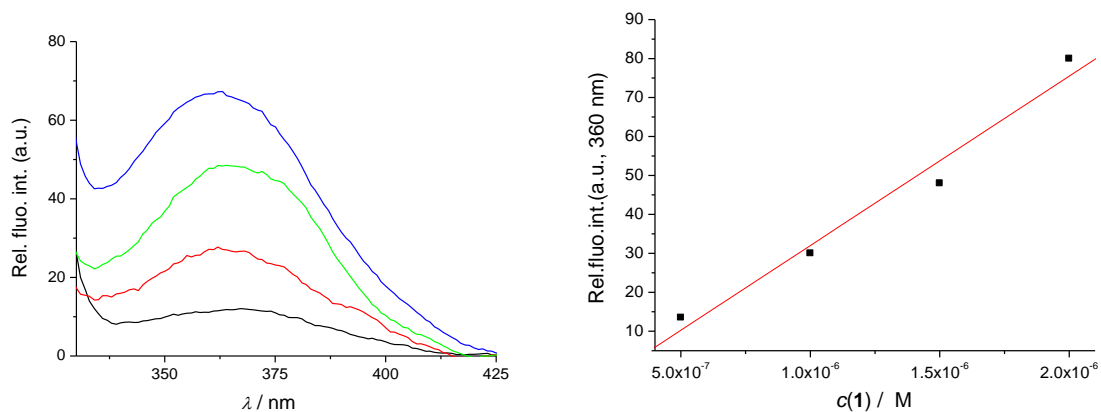

Figure S5. Fluorescence spectra of **1** ( $\lambda_{\text{exc}} = 300 \text{ nm}$ ) at micromolar concentrations, in buffer sodium cacodylate (pH 7.0,  $I = 0.05 \text{ M}$ ). Note baseline increase  $>420 \text{ nm}$  for the highest concentration, attributed to colloidalisation.

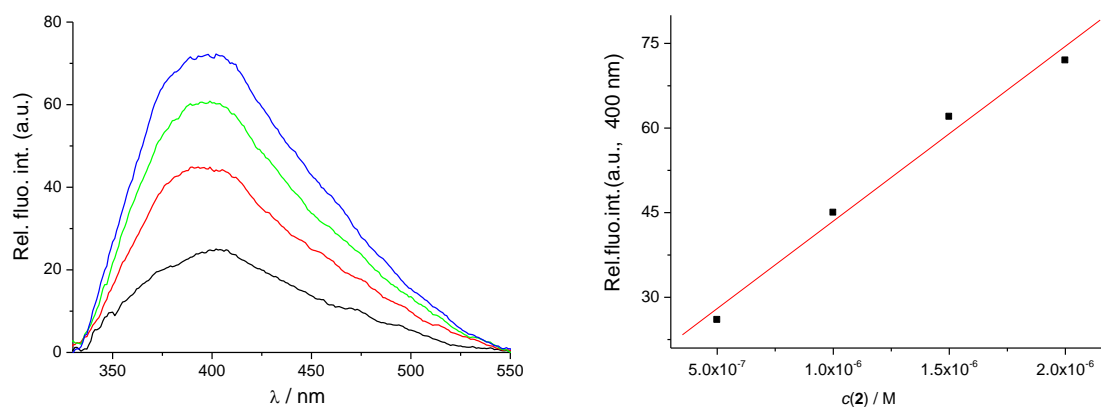

Figure S6. Fluorescence spectra of **2** ( $\lambda_{\text{exc}} = 300 \text{ nm}$ ) at micromolar concentrations, in buffer sodium cacodylate (pH 7.0,  $I = 0.05 \text{ M}$ ).

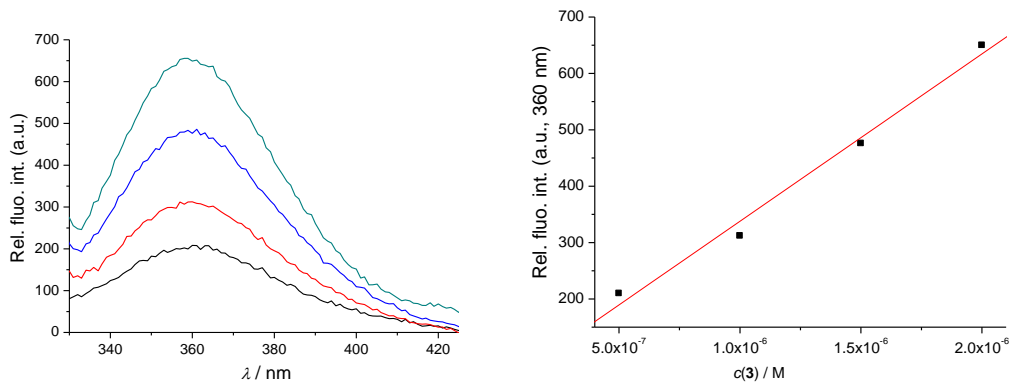

Figure S7. Fluorescence spectra of **3** ( $\lambda_{\text{exc}} = 300 \text{ nm}$ ) at micromolar concentrations, in buffer sodium cacodylate (pH 7.0,  $I = 0.05 \text{ M}$ ). Note baseline increase  $>420 \text{ nm}$  for the highest concentration, attributed to colloidalisation.

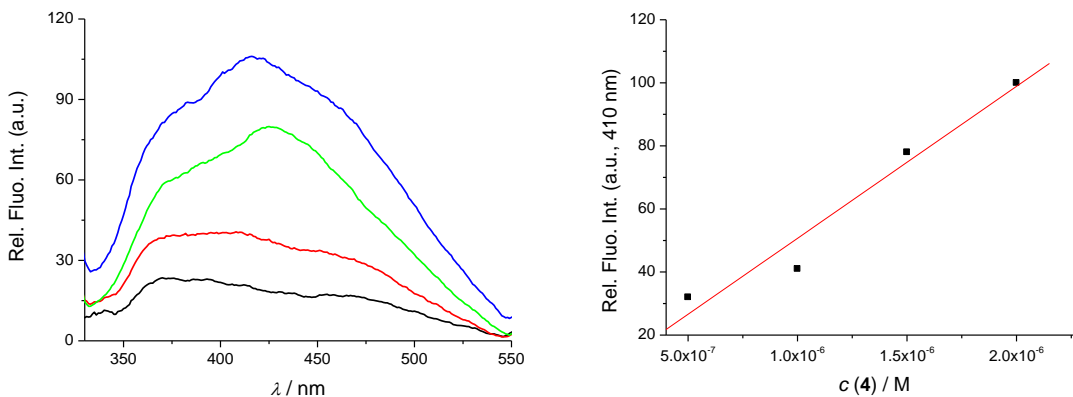

Figure S8. Fluorescence spectra of **4** ( $\lambda_{\text{exc}} = 300 \text{ nm}$ ) at micromolar concentrations, in buffer sodium cacodylate (pH 7.0,  $I = 0.05 \text{ M}$ ).

Relative quantum yields of fluorescence ( $\Phi_f$ ) were measured at room temperature (25 °C) in sodium cacodylate buffer, pH 7, I = 0.05 M, by use of the fluorescence standard with optical properties closely matching the samples **1-4**: NATA (N-acetyl tryptophan amide) [3]. Before the measurements, the solutions were purged with Argon for 30 min. The concentrations were adjusted to absorbances of less than 0.1 at the excitation wavelengths of 270, 280 and 290 nm.

Fluorescence quantum yield was calculated according to:

$$\Phi_f = \Phi_{\text{Ref}} \left( \frac{n}{n_R} \right)^2 \frac{I}{I_R} \frac{1-10^{-A_R}}{1-10^{-A}} \quad (\text{S1})$$

$\Phi_f$  and  $\Phi_{\text{Ref}}$  – fluorescence quantum yield of compound and the reference;

$n$  and  $n_R$  – refractive index of the solvent in which compound or the reference was dissolved;

$A$  and  $A_R$  – absorbance of the compound and the reference at the excitation wavelength;

$I$  and  $I_R$  – area under emission curve of the compound and the reference

**Table S2.** Relative quantum yields ( $\Phi_f$ ) of calixarenes **1-4** determined in comparison to NATA (N-acetyl-L-tryptophanamide,  $\Phi_R=0.14$ ,  $\lambda_{\text{exc}} = 280$  nm) standard[3].

| $\lambda_{\text{exc}} / \text{nm}$ | <b>1</b>            | <b>2</b>            | <b>3</b>     | <b>4</b>            |
|------------------------------------|---------------------|---------------------|--------------|---------------------|
| 270                                | <sup>b</sup> 0.0003 | <sup>b</sup> 0.0008 | 0.0029±0.001 | <sup>b</sup> 0.0003 |
| 280                                | <sup>b</sup> 0.0003 | 0.0011±0.001        | 0.0031±0.001 | <sup>b</sup> 0.0002 |
| 290                                | <sup>b</sup> 0.0005 | 0.0027±0.001        | 0.0047±0.001 | <sup>b</sup> 0.0008 |

<sup>a</sup> Fluorescence quantum yield estimated using NATA as a standard. The fluorescence spectra were measured by exciting at 270, 280 and 290 nm. The measurements were performed three times and the average values are reported. The associated errors correspond to the maximum absolute deviation; <sup>b</sup> Estimated values due to too low intensity of emission, generally could be considered as  $\Phi_f < 0.001$ .

<sup>3</sup> M. G. Gore, Spectrophotometry and Spectrofluorimetry. A Practical Approach, Oxford University Press, 2000, p. 57.

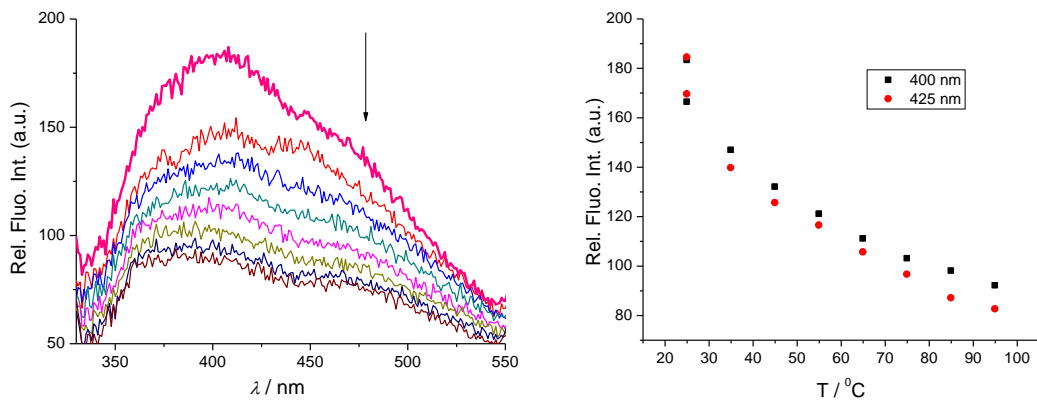

Figure S9. Temperature dependence (temperature range from 25 to 95°C) of emission of **4** ( $c = 2 \times 10^{-6}$  M). Note excellent recovery upon cooling back to 25°C.

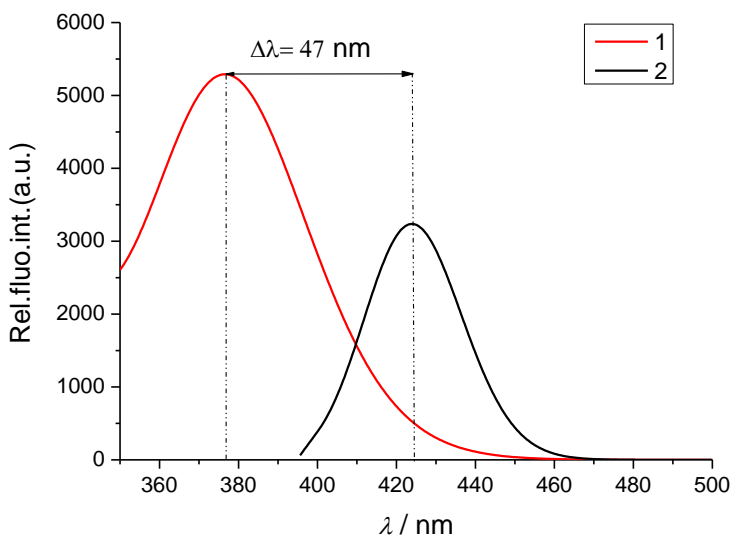

Figure S10. Comparison of calculated fluorescence spectra for compounds **1** and **2** obtained by TD-DFT (PCM/B3LYP/6-31G(d)).  $\lambda_{em}(1) = 376$  nm,  $\lambda_{em}(2) = 423$  nm.



### 3. Fluorimetric titrations with nucleotides:

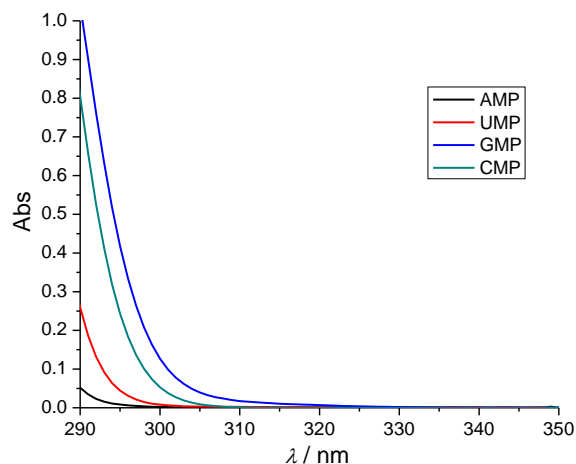

Figure S11. UV/vis spectra of mononucleotides ( $c = 10^{-3}$  M) at pH 7.0; sodium cacodylate buffer,  $I = 0.05$  M.

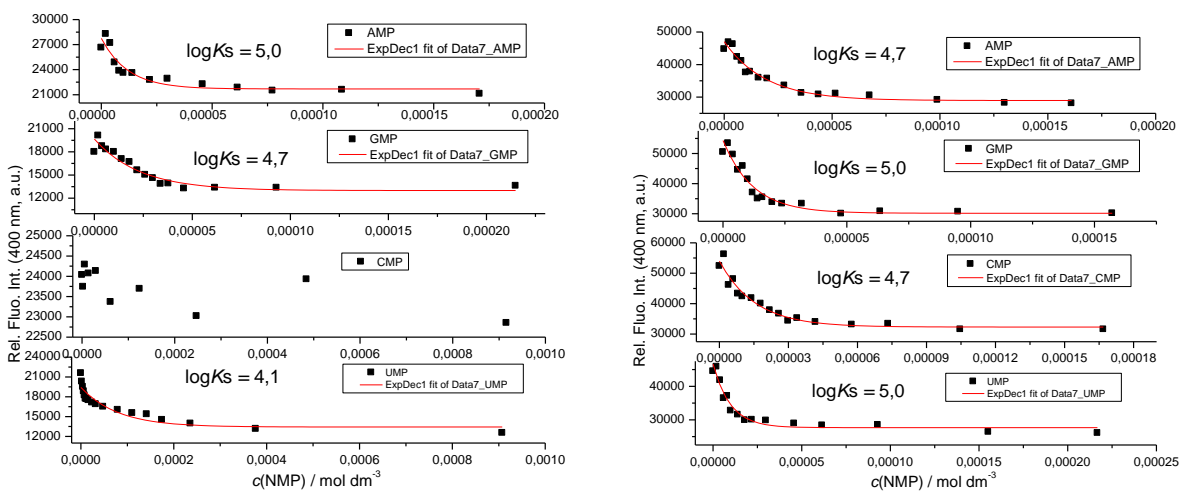

Figure S12. Changes in fluorescence of: **LEFT) 1** ( $\lambda_{exc} = 300$  nm,  $\lambda_{em} = 400$  nm,  $c = 1 \times 10^{-5}$  M) or **RIGHT) 3** ( $\lambda_{exc} = 300$  nm,  $\lambda_{em} = 400$  nm,  $c = 1 \times 10^{-6}$  M); upon addition of nucleotides. Done at pH 7.0; sodium cacodylate buffer,  $I = 0.05$  M. Note that titrations were performed on Edinburgh FS5 instrument due to its superior sensitivity, and y-axis relative values differ from other figures, at which emission spectra were collected on Agilent Eclipse fluorimeter.

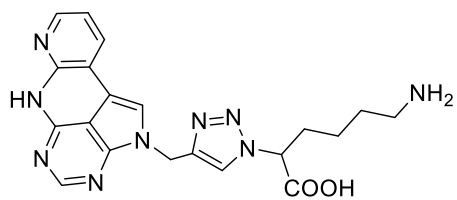

**D8-111TFA**—fluorescent nucleobase “clicked” to lysine

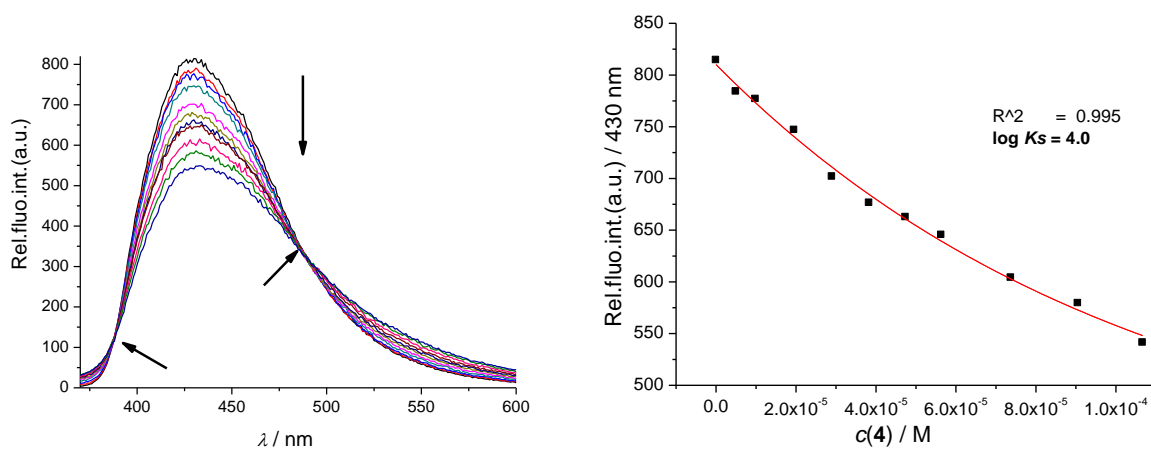

Figure S13 LEFT: Fluorimetric titration of **D8-111TFA** ( $c = 5 \times 10^{-6}$  M;  $\lambda_{\text{exc}} = 350$  nm) with **4** ( $c = 5 \times 10^{-6}$  M) in buffer sodium cacodylate (pH 7.0,  $I = 0.05$  M). RIGHT: Dependence of fluorescence at  $\lambda_{\text{max}} = 430$  nm on  $c(\text{BC135})$ .

#### 4. Titrations with DNA/RNA – displacement experiments

Description of the procedure:  $\lambda_{exc} = 520$  nm; 2 mL quartz cuvette

Polynucleotide in cuvette  $c = 5 \times 10^{-5}$  M, emission at 600 nm Int = 0

EB in cuvette,  $c = 5 \times 10^{-6}$  M; emission at 600 nm collected

Polynucleotide/EB in cuvette (ratio EB/DNA = 0,1); emission spectrum collected,

Successive additions of studied compound, for ratio [EB] / [cpd.] = 1 – 0,1 emission at 600 nm collected

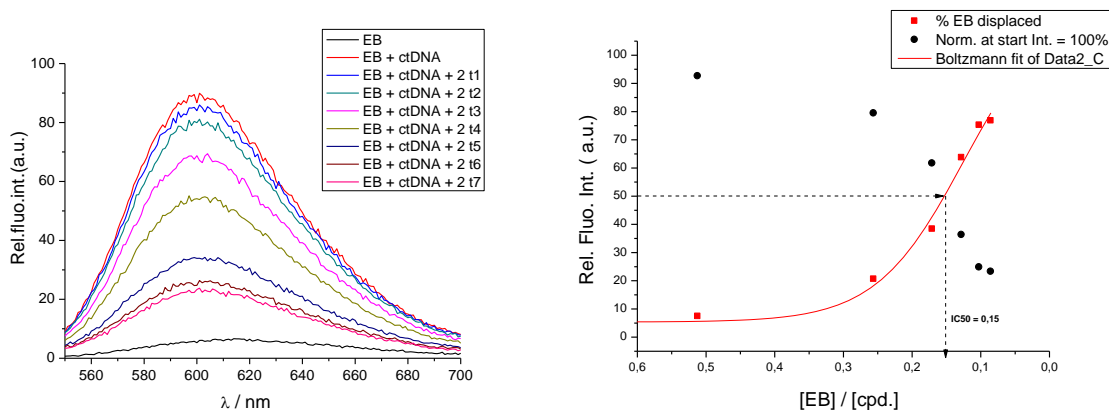

Figure S14. Ethidium bromide displacement ( $c = 5 \times 10^{-6}$  M;  $\lambda_{exc} = 520$  nm) from **ctDNA** ( $c = 1 \times 10^{-6}$  M) with **2**, in buffer sodium cacodylate (pH 7.0,  $I = 0.05$  M).

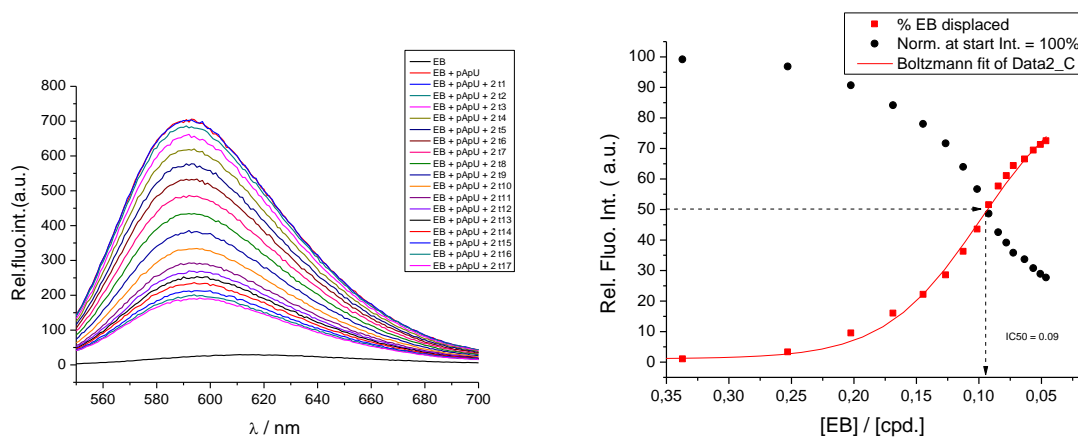

Figure S15. Ethidium bromide displacement ( $c = 5 \times 10^{-6}$  M ;  $\lambda_{exc} = 520$  nm) after binding with **poly A – poly U**, with **2** ( $c = 5 \times 10^{-6}$  M), in buffer sodium cacodylate (pH 7.0,  $I = 0.05$  M).

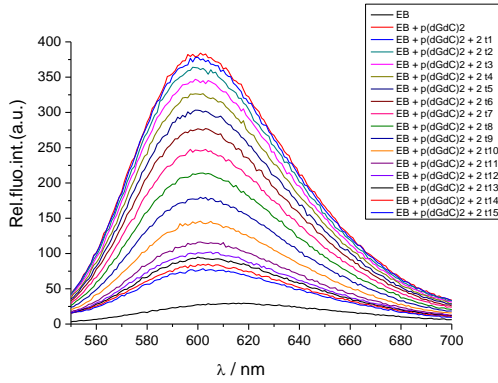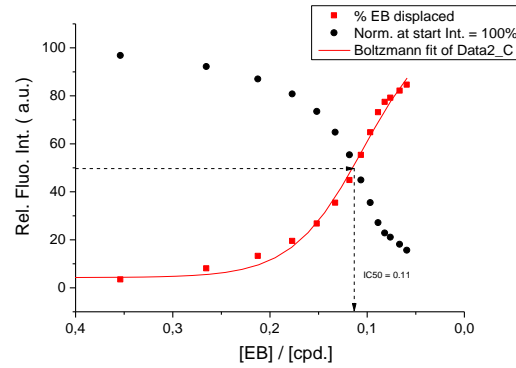

Figure S16. Ethidium bromide displacement ( $c = 5 \times 10^{-6}$  M ;  $\lambda_{exc} = 520$  nm) after binding with **poly dGdC – poly dGdC**, with **2** ( $c = 5 \times 10^{-6}$  M), in buffer sodium cacodylate (pH 7.0,  $I = 0.05$  M).

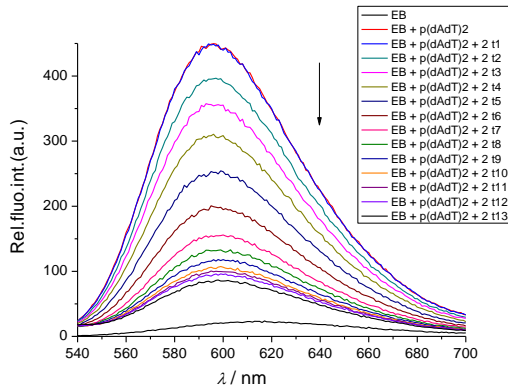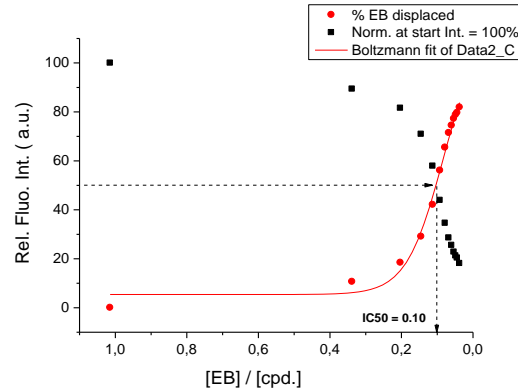

Figure S17. Ethidium bromide displacement ( $c = 5 \times 10^{-6}$  M ;  $\lambda_{exc} = 520$  nm) after binding with **poly dAdT – poly dAdT**, with **2** ( $c = 5 \times 10^{-6}$  M), in buffer sodium cacodylate (pH 7.0,  $I = 0.05$  M).

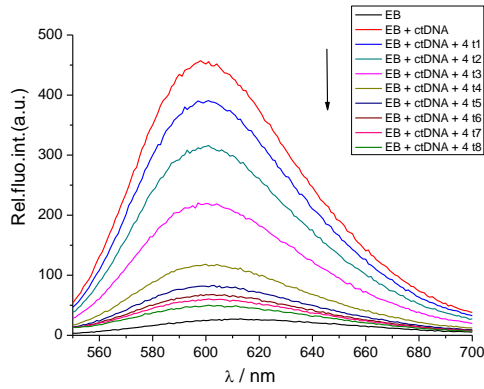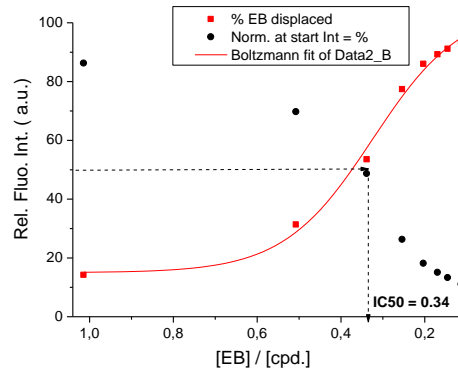

Figure S18. Ethidium bromide displacement ( $c = 5 \times 10^{-6}$  M ;  $\lambda_{exc} = 520$  nm) after binding with **ctDNA**, with **4** ( $c = 5 \times 10^{-6}$  M), in buffer sodium cacodylate (pH 7.0,  $I = 0.05$  M).

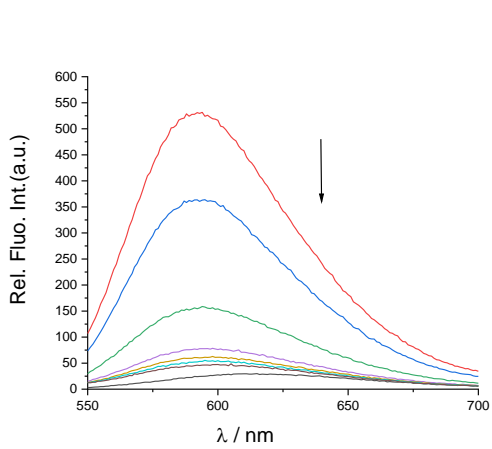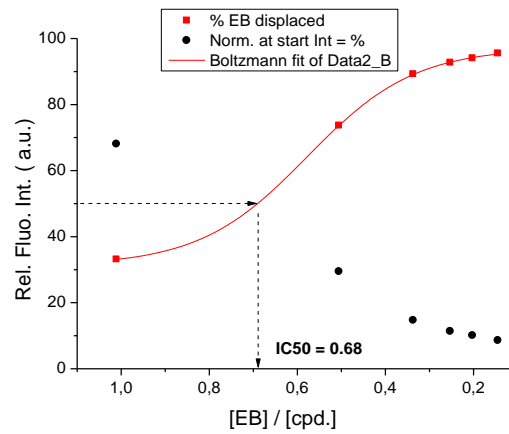

Figure S19. Ethidium bromide displacement ( $c = 5 \times 10^{-6}$  M ;  $\lambda_{exc} = 520$  nm) after binding with **poly A – poly U**, with **4** ( $c = 5 \times 10^{-6}$  M), in buffer sodium cacodylate (pH 7.0,  $I = 0.05$  M).

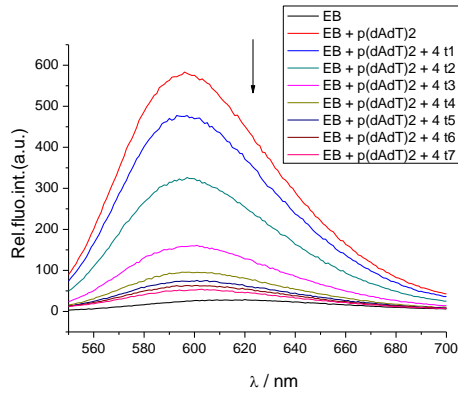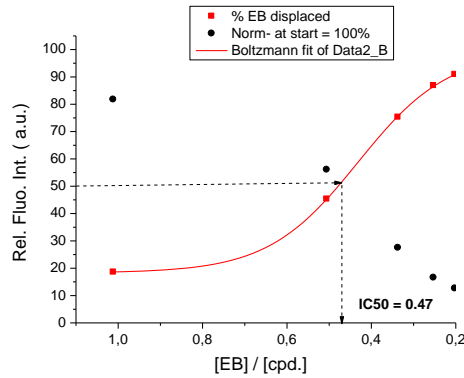

Figure S20. Ethidium bromide displacement ( $c = 5 \times 10^{-6}$  M ;  $\lambda_{exc} = 520$  nm) after binding with **poly dAdT – poly dAdT**, with **4** ( $c = 5 \times 10^{-6}$  M), in buffer sodium cacodylate (pH 7.0,  $I = 0.05$  M).

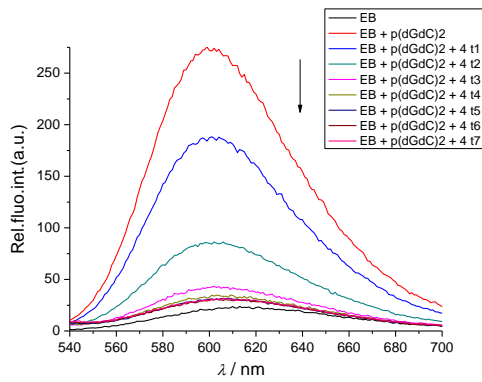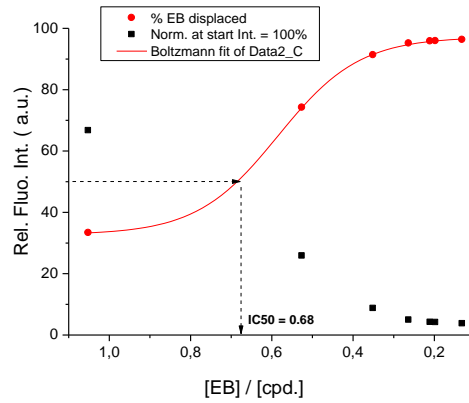

Figure S21. Ethidium bromide displacement ( $c = 5 \times 10^{-6}$  M ;  $\lambda_{exc} = 520$  nm) after binding with **poly dGdC – poly dGdC**, with **4** ( $c = 5 \times 10^{-6}$  M), in buffer sodium cacodylate (pH 7.0,  $I = 0.05$  M).

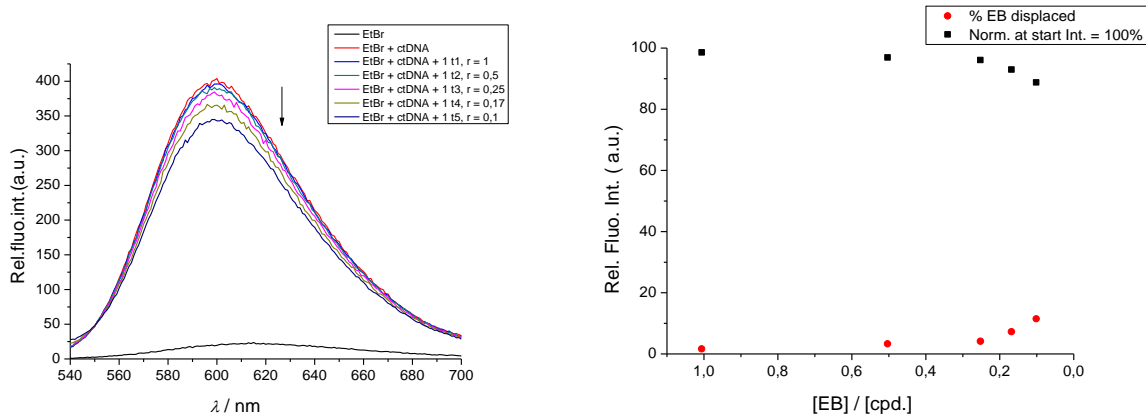

Figure S22. Ethidium bromide displacement ( $c = 5 \times 10^{-6}$  M ;  $\lambda_{exc} = 520$  nm) after binding with **ctDNA** ( $c = 5 \times 10^{-5}$  M), with **1** ( $c = 5 \times 10^{-6}$  M), in buffer sodium cacodylate (pH 7.0,  $I = 0.05$  M). No measurable change in Rel. Fluor. Int.

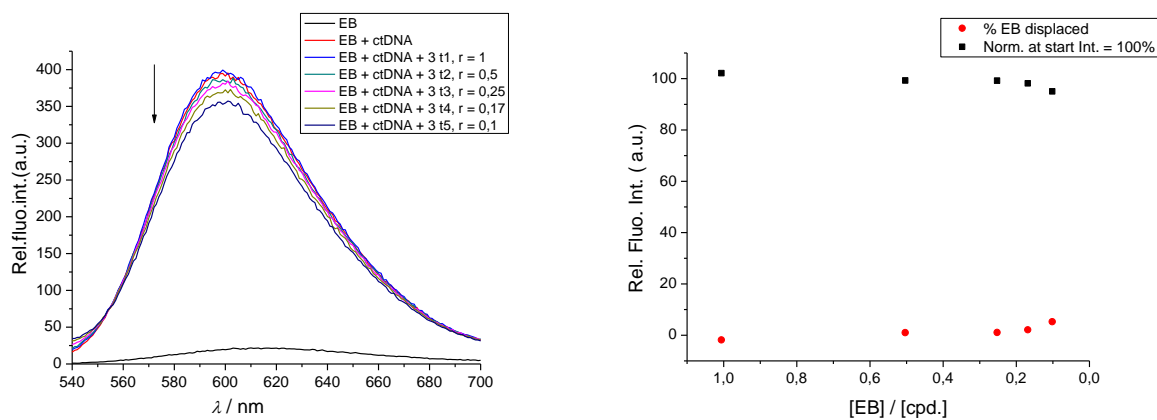

Figure S23. Ethidium bromide displacement ( $c = 5 \times 10^{-6}$  M ;  $\lambda_{exc} = 520$  nm) after binding with **ctDNA** ( $c = 5 \times 10^{-5}$  M), with **3** ( $c = 5 \times 10^{-6}$  M), in buffer sodium cacodylate (pH 7.0,  $I = 0.05$  M).

## 5. Thermal denaturation experiments

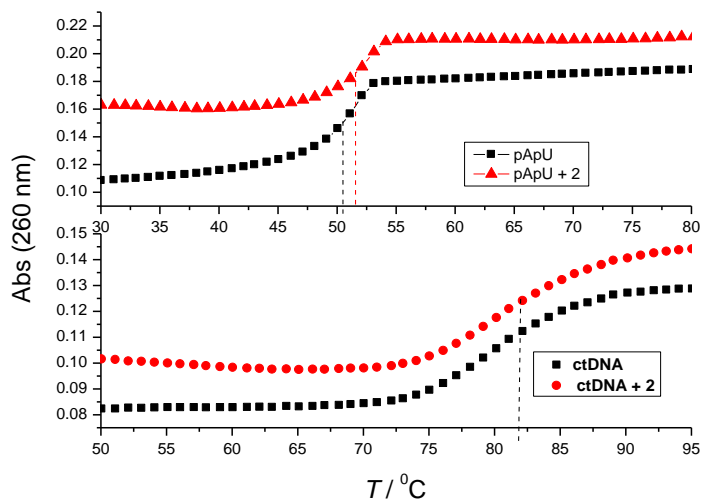

Figure S24. Thermal denaturation curves of **ct-DNA** ( $c(\text{ct-DNA}) = 2.5 \times 10^{-5}\text{M}$ ,  $r_{[2]}/[\text{ct-DNA}] = 0.3$ ) and **poly A - poly U** ( $c(\text{pApU}) = 2.5 \times 10^{-5}\text{M}$ ,  $r_{[2]}/[\text{ct-DNA}] = 0.3$ ) at pH 7.0 (sodium cacodylate buffer,  $I = 0.05\text{ M}$ ) upon addition of **2**. Error in  $\Delta T_m$  values:  $\pm 0.5\text{ }^\circ\text{C}$ .

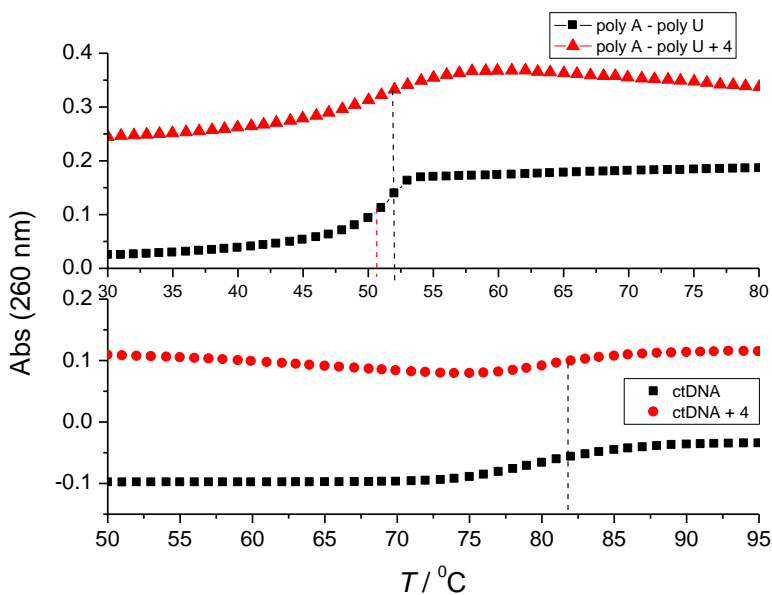

Figure S25. Thermal denaturation curves of **ct-DNA** ( $c(\text{ct-DNA}) = 2.5 \times 10^{-5}\text{M}$ ,  $r_{[4]}/[\text{ct-DNA}] = 0.3$ ) and **poly A - poly U** ( $c(\text{pApU}) = 2.5 \times 10^{-5}\text{M}$ ,  $r_{[4]}/[\text{ct-DNA}] = 0.3$ ) at pH 7.0 (sodium cacodylate buffer,  $I = 0.05\text{ M}$ ) upon addition of **4**. Error in  $\Delta T_m$  values:  $\pm 0.5\text{ }^\circ\text{C}$ .



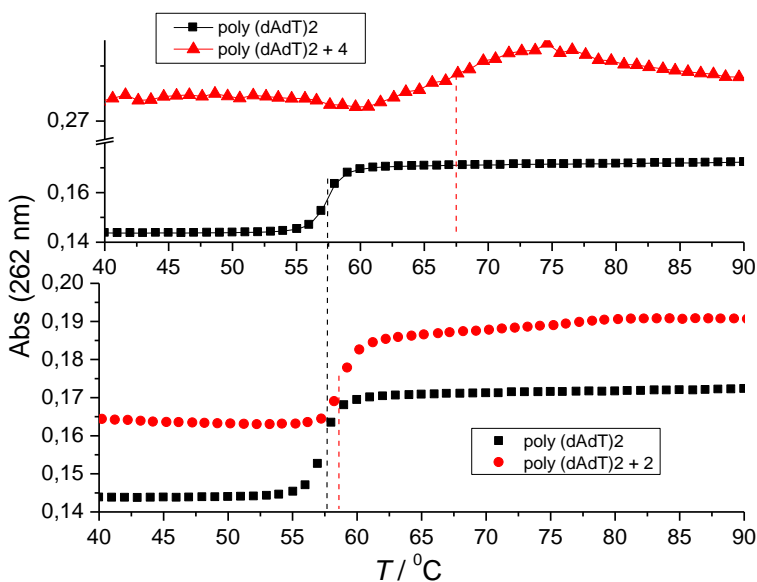

Figure S26. Thermal denaturation curves of **poly (dAdT)<sub>2</sub>** ( $c(p(dAdT)_2) = 2.5 \times 10^{-5}$  M,  $r_{[(cpd.)]/[p(dAdT)_2]} = 0.3$ ) at pH 7.0 (sodium cacodylate buffer,  $I = 0.05$  M) upon addition of **2** and **4**. Error in  $\Delta T_m$  values:  $\pm 0.5$  °C.

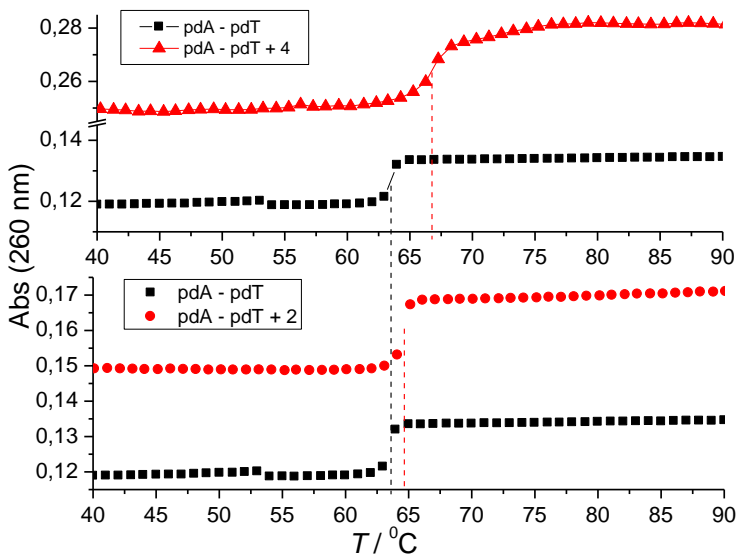

Figure S27. Thermal denaturation curves of **poly dA – poly dT** ( $c(p(dAdT)) = 2.5 \times 10^{-5}$  M,  $r_{[(cpd.)]/[p(dAdT)_2]} = 0.3$ ) at pH 7.0 (sodium cacodylate buffer,  $I = 0.05$  M) upon addition of **2** and **4**. Error in  $\Delta T_m$  values:  $\pm 0.5$  °C.

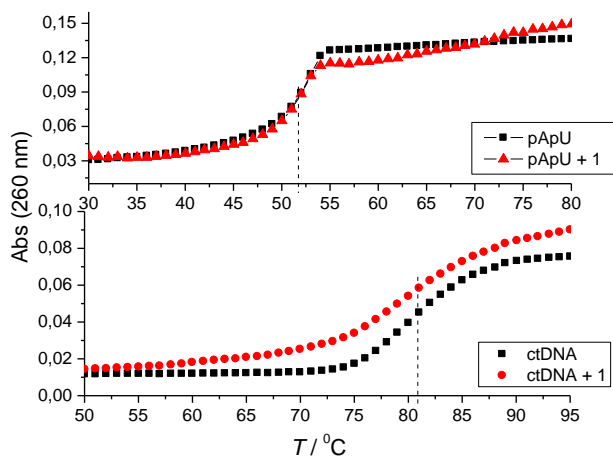

Figure S28. Thermal denaturation curves of **ctDNA** ( $c(\text{ctDNA}) = 2.5 \times 10^{-5} \text{M}$ ,  $\eta_{(1)}/[\text{ctDNA}] = 0.3$ ) and **poly A - poly U** ( $c(\text{pApU}) = 2.5 \times 10^{-5} \text{M}$ ,  $\eta_{(1)}/[\text{pApU}] = 0.3$ ) at pH 7.0 (sodium cacodylate buffer,  $I = 0.05 \text{M}$ ) upon addition of **1**. Error in  $\Delta T_m$  values:  $\pm 0.5 \text{ } ^\circ\text{C}$ .

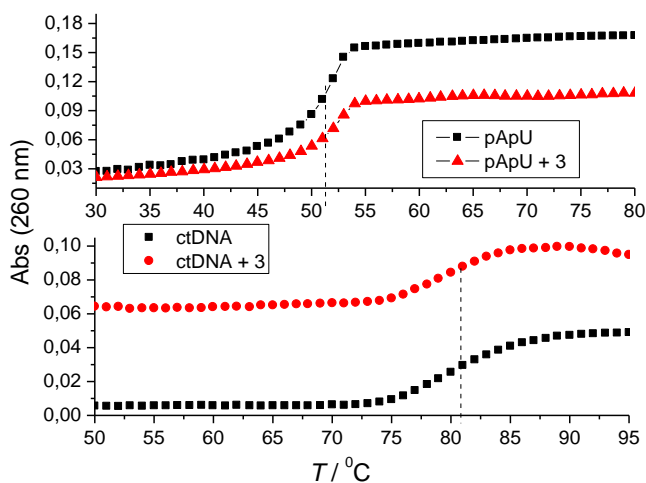

Figure S29. Thermal denaturation curves of **ctDNA** ( $c(\text{ctDNA}) = 2.5 \times 10^{-5} \text{M}$ ,  $\eta_{(3)}/[\text{ctDNA}] = 0.3$ ) and **poly A - poly U** ( $c(\text{pApU}) = 2.5 \times 10^{-5} \text{M}$ ,  $\eta_{(3)}/[\text{pApU}] = 0.3$ ) at pH 7.0 (sodium cacodylate buffer,  $I = 0.05 \text{M}$ ) upon addition of **3**. Error in  $\Delta T_m$  values:  $\pm 0.5 \text{ } ^\circ\text{C}$ .

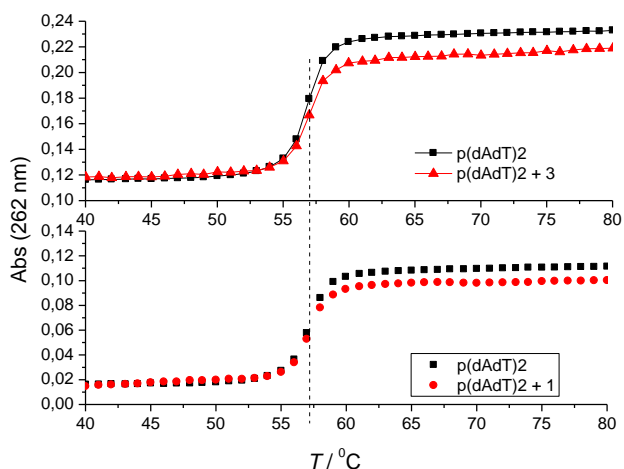

Figure S30. Thermal denaturation curves of **p(dAdT)<sub>2</sub>** ( $c(\text{p(dAdT)}_2) = 2,5 \times 10^{-5} \text{ M}$ ,  $\eta_{[\text{cmp}]} / [\text{p(dAdT)}_2] = 0.3$ ) (sodium cacodylate buffer,  $I = 0.05 \text{ M}$ ) upon addition of **1** and **3**. Error in  $\Delta T_m$  values:  $\pm 0.5 \text{ }^\circ\text{C}$

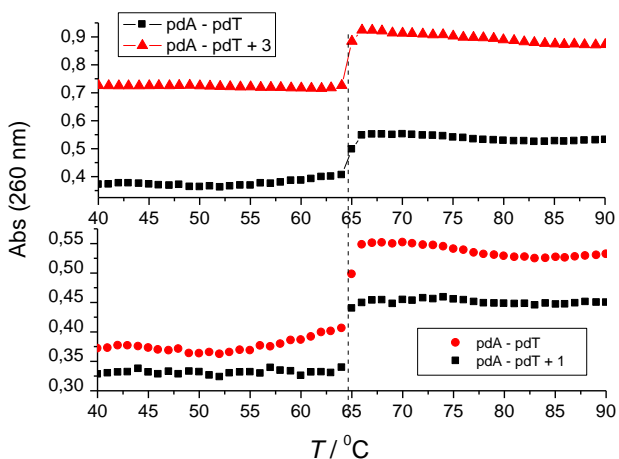

Figure S31. Thermal denaturation curves of **pdA - pdT** ( $c(\text{pdA - pdT}) = 2,5 \times 10^{-5} \text{ M}$ ,  $\eta_{[\text{cmp}]} / [\text{pdA-pdT}] = 0.3$ ) (sodium cacodylate buffer,  $I = 0.05 \text{ M}$ ) upon addition of **1** and **3**. Error in  $\Delta T_m$  values:  $\pm 0.5 \text{ }^\circ\text{C}$

## 6. Circular dichroism (CD) experiments

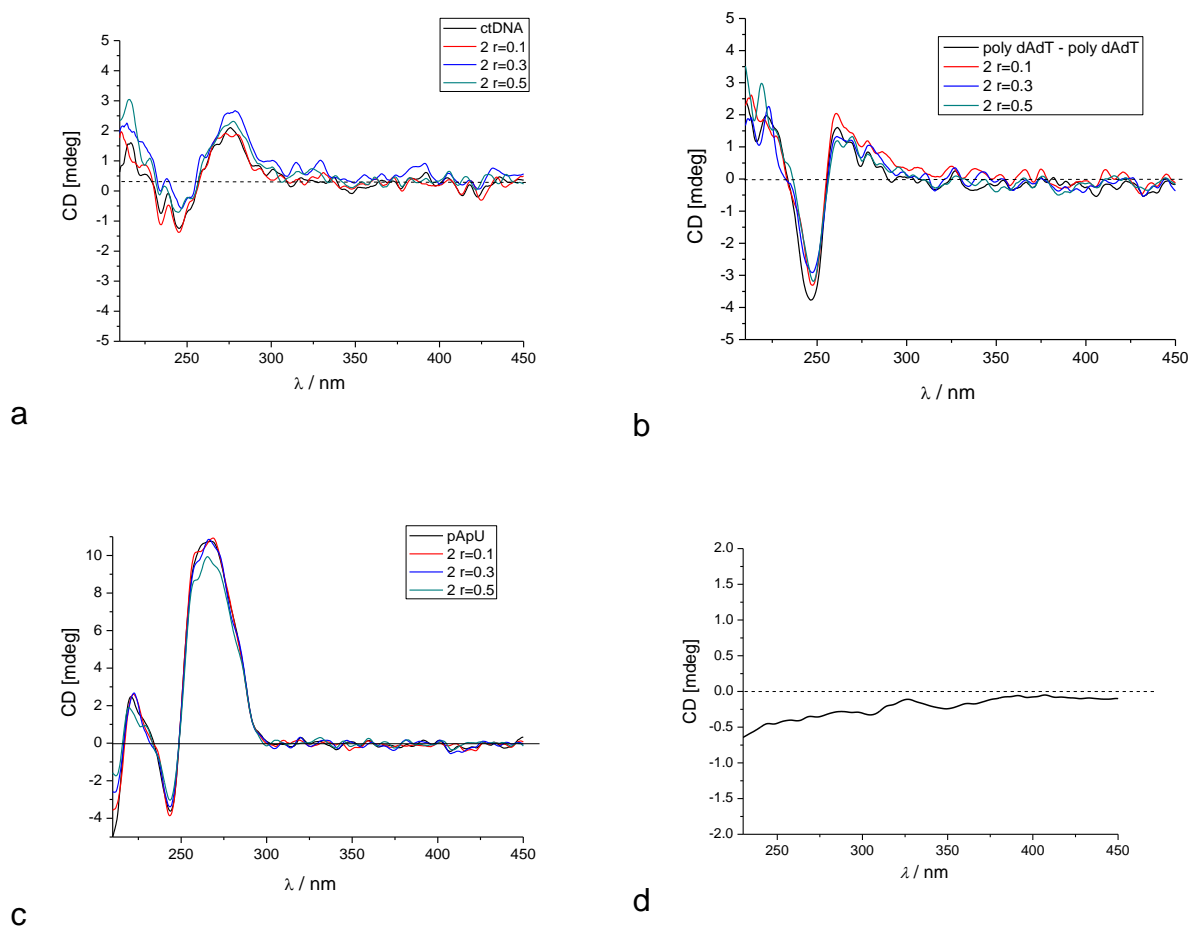

Figure S32. **a-c**) CD titration of ct-DNA, poly (dAdT)<sub>2</sub> and poly A – poly U (all DNA/RNA  $c = 2 \times 10^{-5}$  M) with **2** at molar ratios  $r = 0,1; 0,3$  and  $0,5$  ( $r = [\text{compound}] / [\text{polynucleotide}]$ ). **d**) CD spectra of **2** ( $c = 1 \times 10^{-5}$  M). All CD experiments were done in sodium cacodylate buffer (pH 7.0,  $I = 0.05$  M).

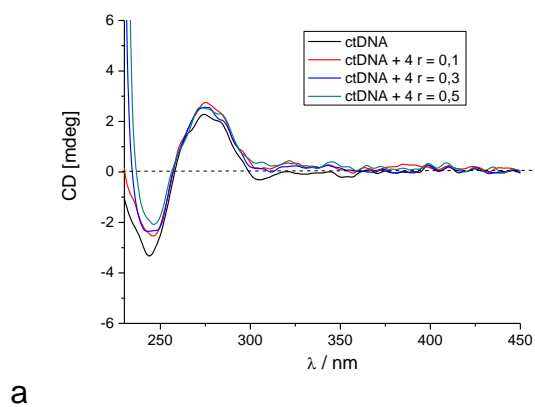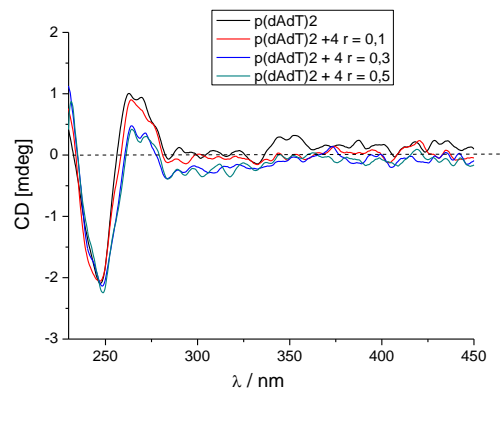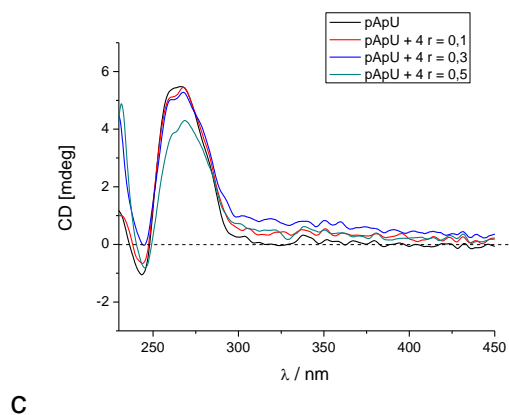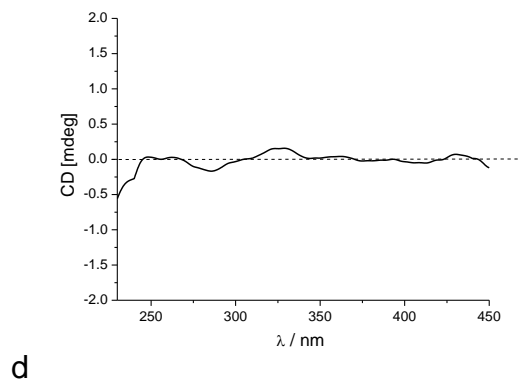

Figure S33. **a-c)** CD titration of ctDNA, poly (dAdT)<sub>2</sub> and poly A – poly U (all DNA/RNA  $c = 2 \times 10^{-5}$  M) with **4** at molar ratios  $r = 0,1; 0,3$  and  $0,5$  ( $r = [\text{compound}] / [\text{polynucleotide}]$ ). **d)** CD spectra of **4** ( $c = 1 \times 10^{-5}$  M). All CD experiments were done in sodium cacodylate buffer (pH 7.0,  $I = 0.05$  M).

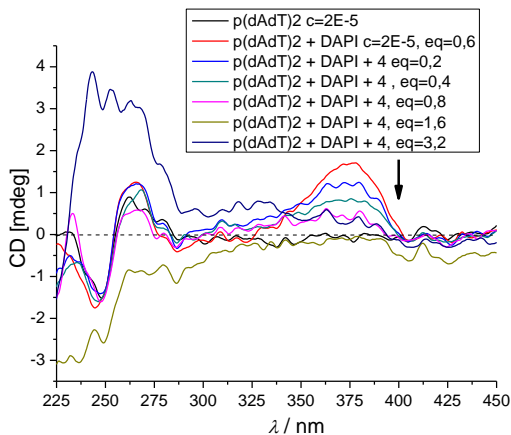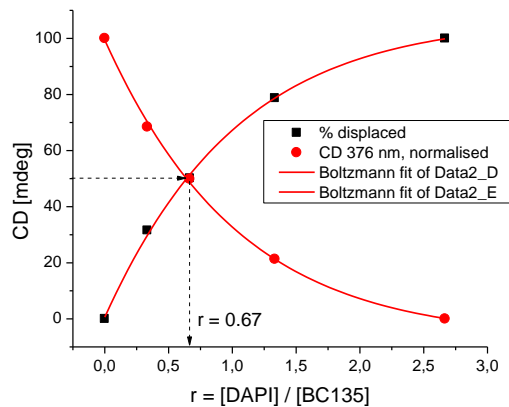

Figure S34. DAPI displacement ( $c = 2 \times 10^{-5}$  M) with **4** ( $c = 2 \times 10^{-5}$  M) after binding to poly (dAdT)<sub>2</sub> in buffer sodium cacodylate (pH 7.0,  $I = 0.05$  M).

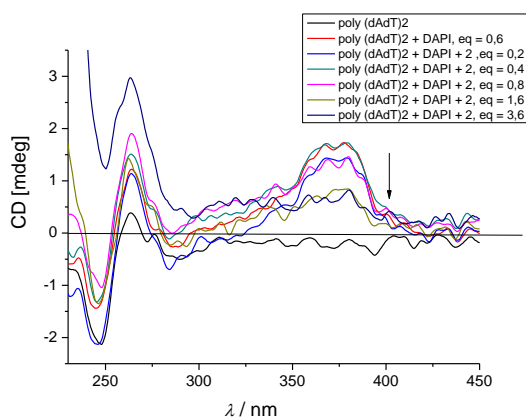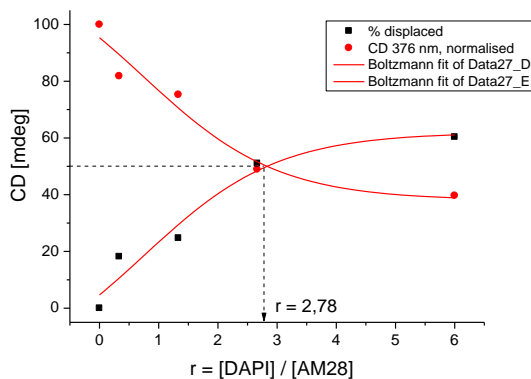

Figure S35. DAPI displacement ( $c = 2 \times 10^{-5}$  M) with **2** ( $c = 2 \times 10^{-5}$  M) after binding to poly (dAdT)<sub>2</sub> in buffer sodium cacodylate (pH 7.0,  $I = 0.05$  M).
